# Supplementary material for: Unraveling the impact of template geometry and confinement on template-assisted self-assembly of nanoparticles
Source: Royal Society of Chemistry journal article supplement (doi:10.1039/d3me00024a), 2023-01-01
Supplement: d3me00024a1.pdf [file d3me00024a1.pdf]

## Supporting Information

# Unraveling the impact of template geometry and confinement on template-assisted self-assembly of nanoparticles

Zhen Luo and Shafigh Mehraeen\*

*Department of Chemical Engineering, University of Illinois at Chicago  
929 West Taylor Street, Chicago, Illinois 60607, United States*

\*Corresponding Author's E-mail: [tranzabi@uic.edu](mailto:tranzabi@uic.edu)

Phone: +1 (312) 996 8734. Fax: +1 (312) 996 0808

We calculated the radial distribution function,  $g(r)$ , of two sample nanoparticles in the bulk shown in Figures 3H (with 100% yield) and I (with 10% yield). The radial distribution functions are illustrated in Figure S1A and B, respectively, where the bars are  $g(r)$  for the sample nanoparticle,  $r$  is the radial distance from the nanoparticle, and red curve is  $g(r)$  averaged over all remaining nanoparticles in the bulk. Comparison of  $g(r)$  in Figure S1A and B suggests that to achieve a high yield, nanoparticles in the bulk must be disordered. We also used  $g(r)$  to calculate entropy per nanoparticle, and average entropy for all nanoparticles remaining in the bulk on the template, given by<sup>1</sup>

$$S = -2\pi\rho k_B \int_0^\infty \{g(r)\ln[g(r)] - g(r) + 1\} r^2 dr, \quad (1)$$

where  $k_B$  is the Boltzmann constant, and  $\rho$  is the nanoparticle density. Insets in Figure S1A and B illustrate the entropy per nanoparticle color coded from red (low) to blue (high), with an average (over all remaining nanoparticles in the bulk) of -2.2 and -3.9, respectively.

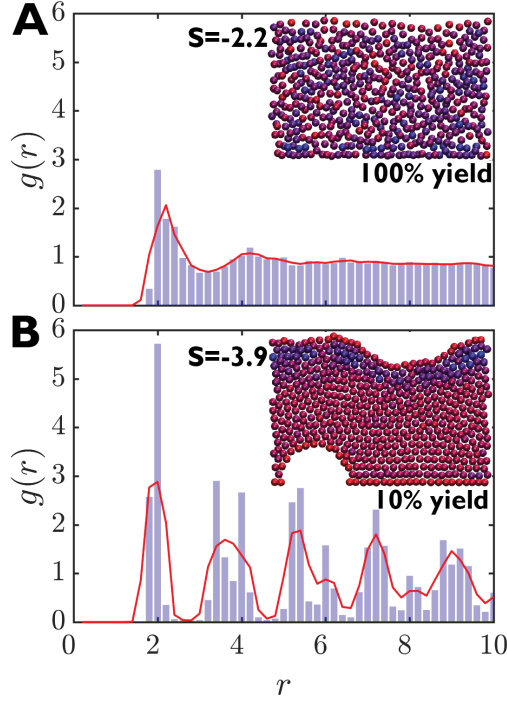

**Figure S1:** (A-B) Radial distribution function,  $g(r)$ , versus  $r$ , for state D (100% yield) and E (10% yield), respectively, on the phase diagram in Figure 2. Bars show  $g(r)$  for a sample nanoparticle, and red curve illustrates  $g(r)$  averaged over all remaining nanoparticles in the bulk. Entropy is color coded from low (red) to blue (high) shown in the inset, whose average is -2.2 and -3.9 for state D and E, respectively. The  $g(r)$  suggests disordered (A) and ordered (B) phase, respective to state D and E on the phase diagram.

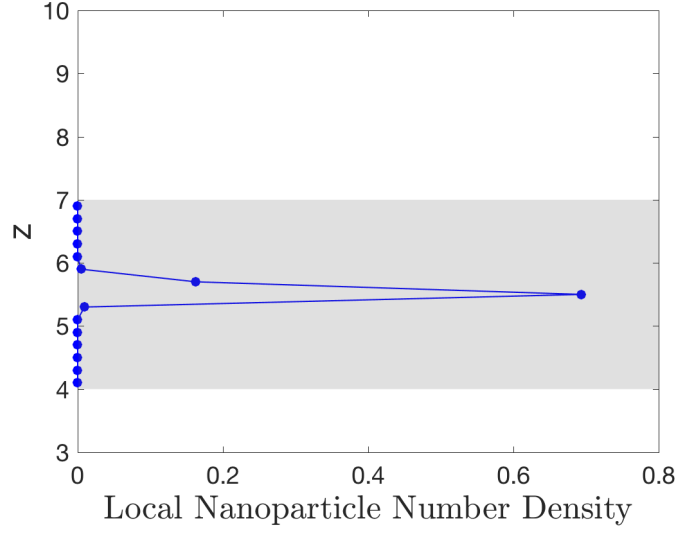

**Figure S2:** Variation of local nanoparticle number density in the  $z$ -direction, where overall nanoparticle number density is  $\rho = 0.05$ , all in nondimensionalized units. The shaded area indicates the liquid film thickness of  $d = 3$ . At this thickness, nanoparticles form a sheet (monolayer) within the liquid film as the density distribution is unimodal.

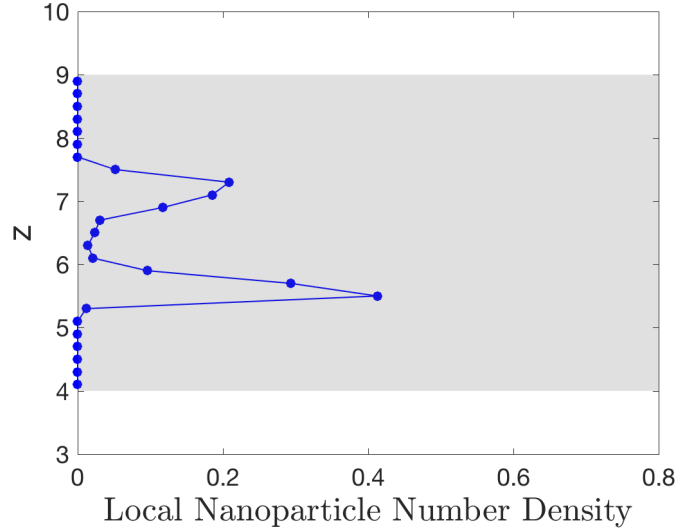

**Figure S3:** Variation of local nanoparticle number density in the  $z$ -direction, where overall nanoparticle number density is  $\rho = 0.05$ , all in nondimensionalized units. The shaded area indicates the liquid film thickness of  $d = 5$ . At this thickness, nanoparticles form a double layer within the liquid film as the density distribution is bimodal.

## References

1. Nettleton, R. E.; Green, M. S. Expression in Terms of Molecular Distribution Functions for the Entropy Density in an Infinite System. *The Journal of Chemical Physics* **1958**, *29*, 1365–1370.
